# Supplementary material for: Atmospheric drivers of Antarctic sea ice extent summer minima
Source: Copernicus journal article supplement (doi:10.5194/tc-2023-45), 2023-04-20
Supplement: Supplementary file 1 [file tc-2023-45-supplement.pdf]

# Atmospheric drivers of Antarctic sea ice extent summer minima

Bianca Mezzina<sup>1</sup>, Hugues Goosse<sup>1</sup>, François Klein<sup>1</sup>, Antoine Barthélemy<sup>1</sup>, François Massonnet<sup>1</sup>

<sup>1</sup> Earth and Climate Center, Earth and Life Institute, Université catholique de Louvain, Louvain-la-Neuve, Belgium

5 Correspondence to: Bianca Mezzina ([bianca.mezzina@uclouvain.be](mailto:bianca.mezzina@uclouvain.be))

## Supplementary material

10

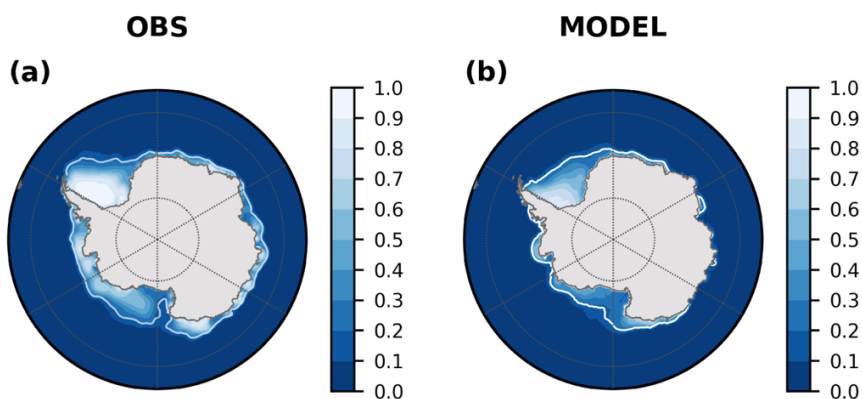

**Figure S1:** JFM climatology of the SIC in the (a) observations and (b) model. The solid line indicates SIC=0.15.

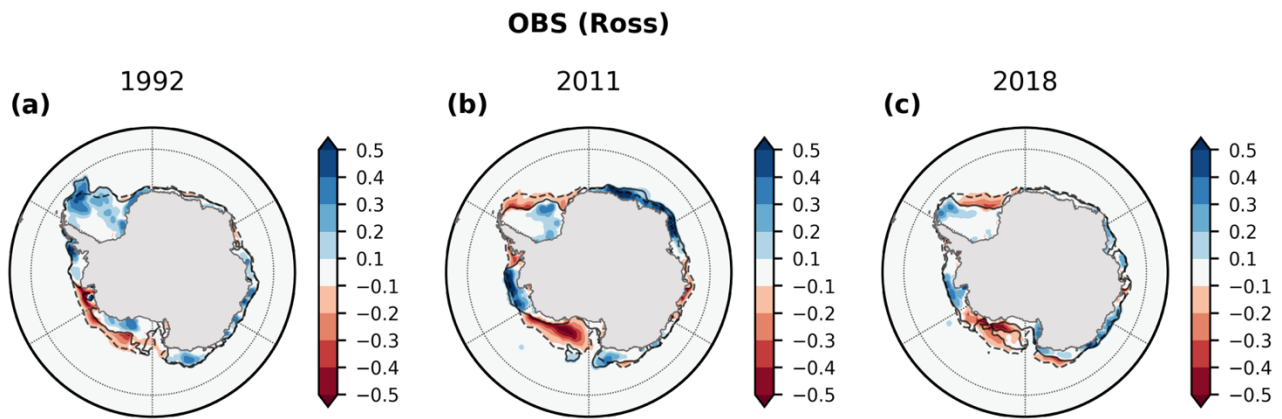

15 **Figure S2:** Shading: observed SIC anomalies in JFM in the years with SIE minima in the Ross Sea. Contours: sea ice edge (SIC=0.15) in the respective years (solid line) and in the climatology (dashed line).

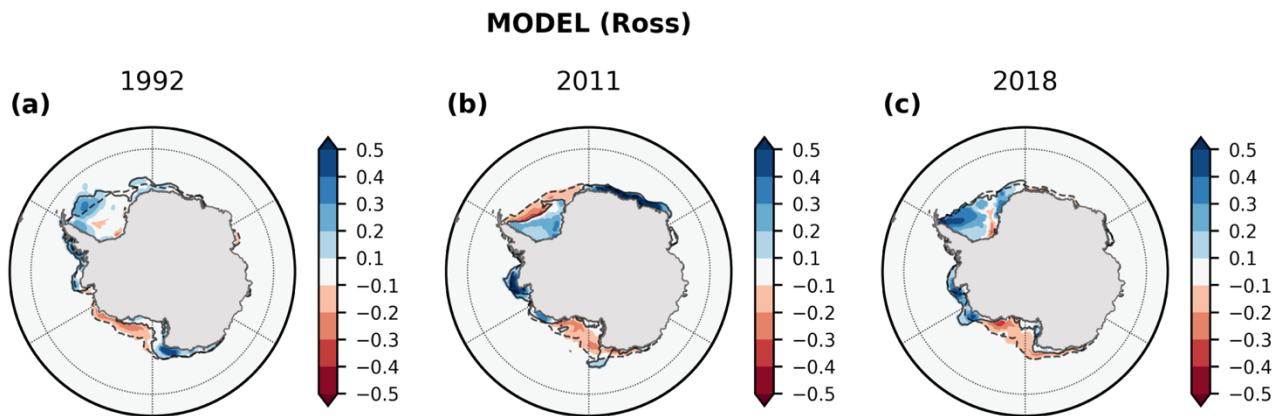

20 **Figure S3:** Same as Fig. S2, but for the model.

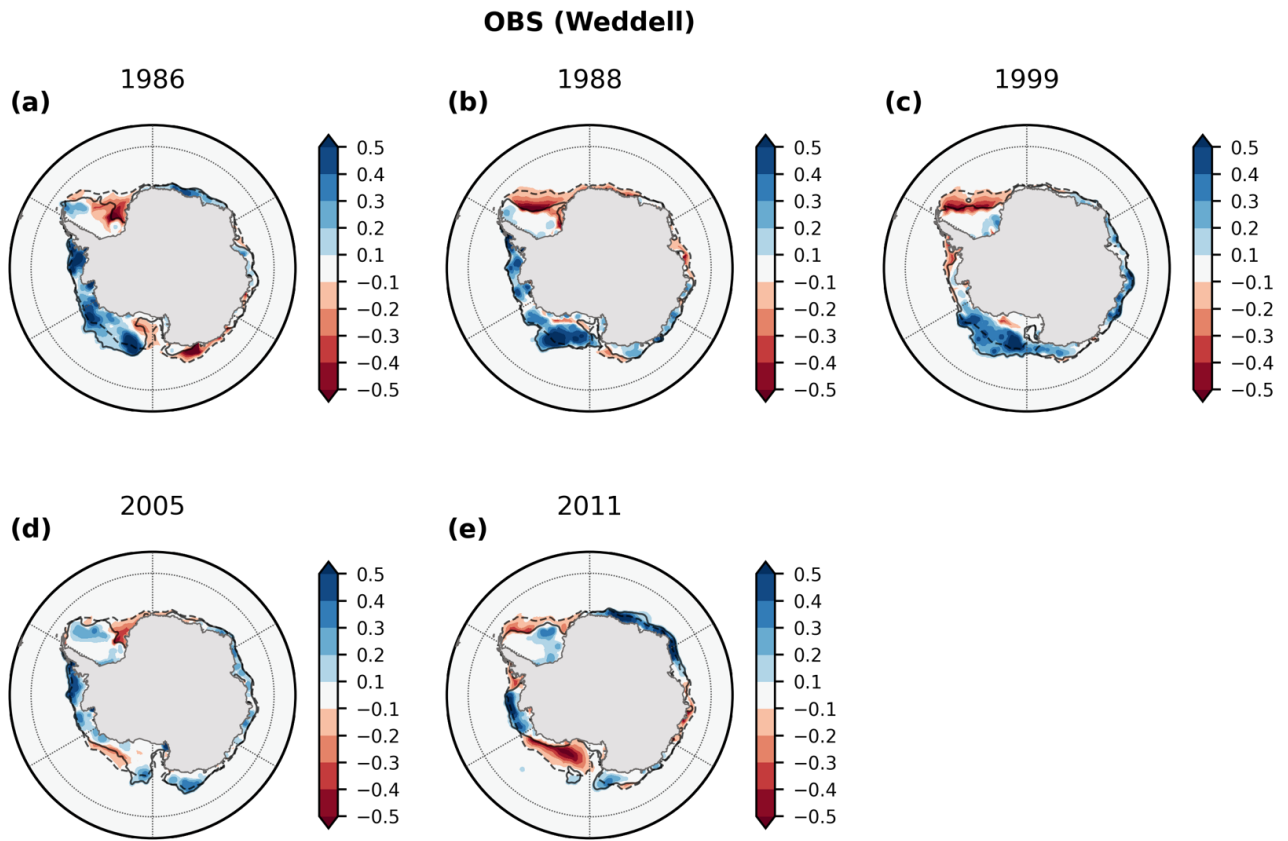

**Figure S4:** Shading: observed SIC anomalies in JFM during the years with SIE minima in the Weddell Sea. Contours: sea ice edge (SIC=0.15) in the respective years (solid line) and in the climatology (dashed line).

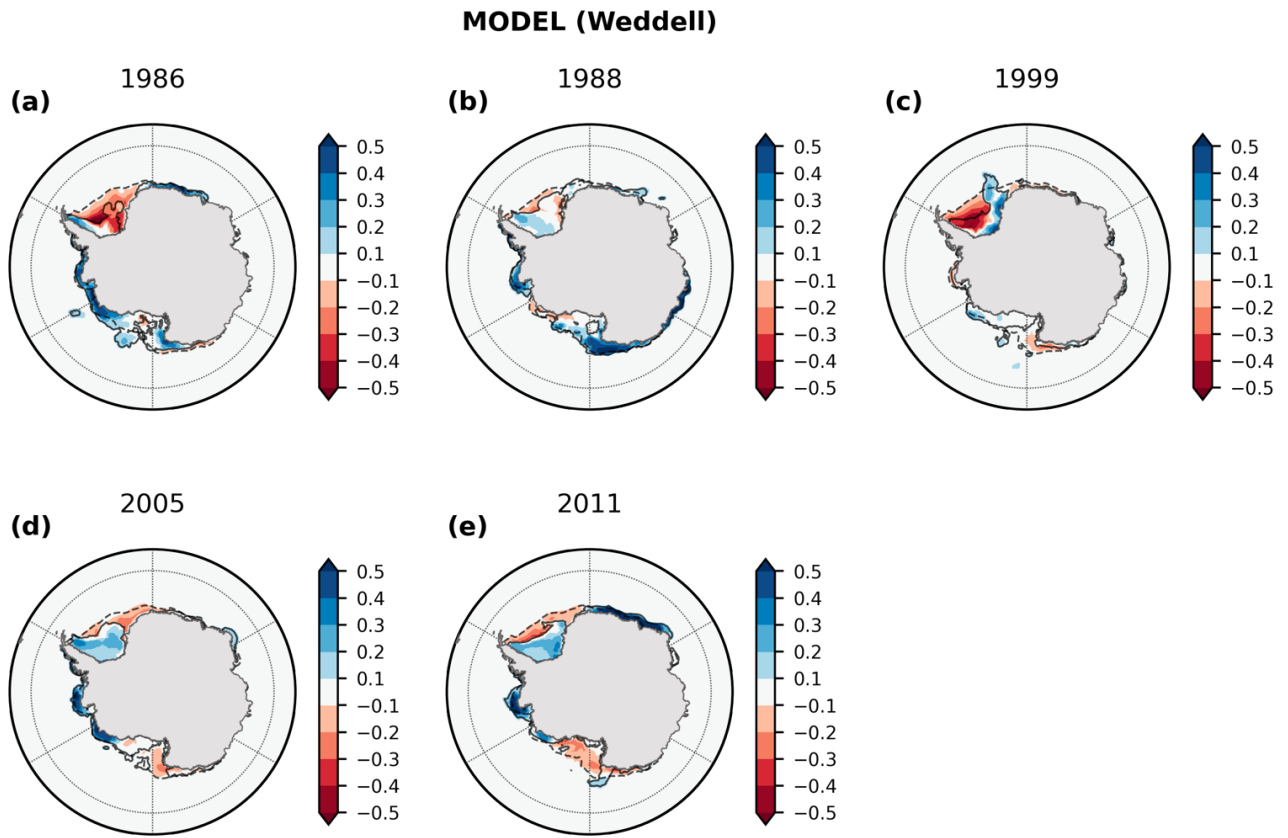

**Figure S5:** Same as Fig. S4, but for the model.

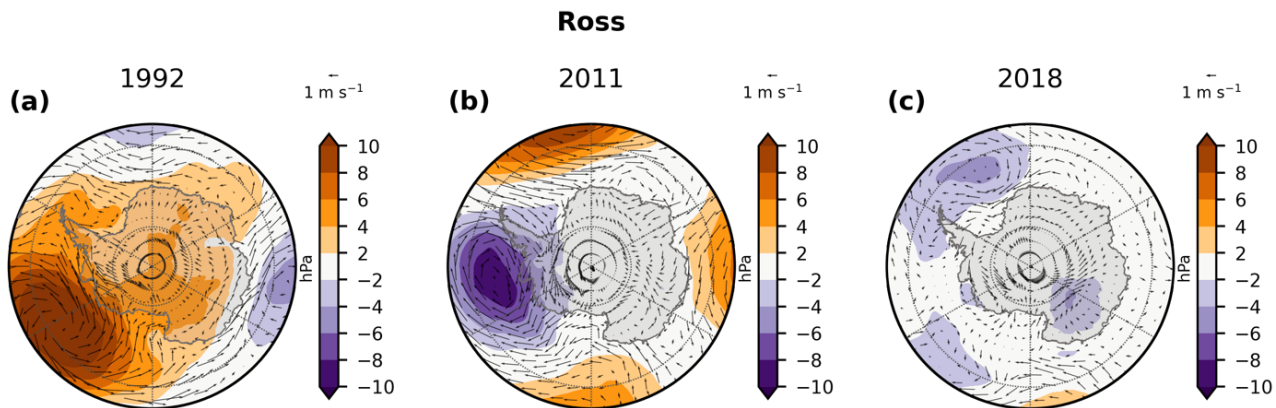

**Figure S6:** SLP (shading) and 10-m wind (arrows) anomalies in the years with SIE minima in the Ross Sea during the previous spring (OND).

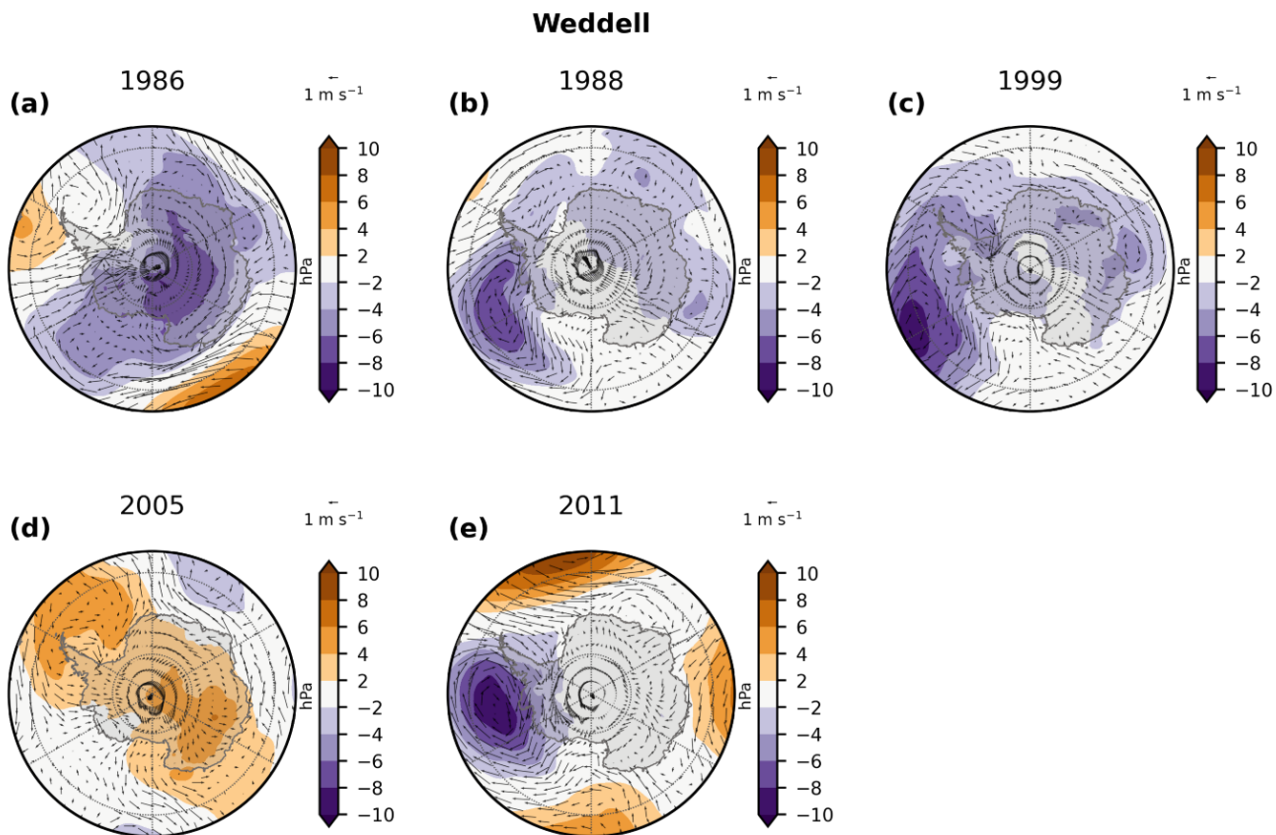

**35 Figure S7:** SLP (shading) and 10-m wind (arrows) anomalies in the years with SIE minima in the Weddell Sea during the previous spring (OND).

## Tendency

(a) Oct

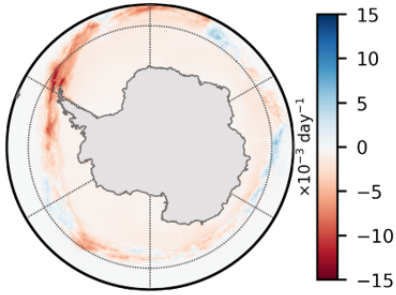

(b) Nov

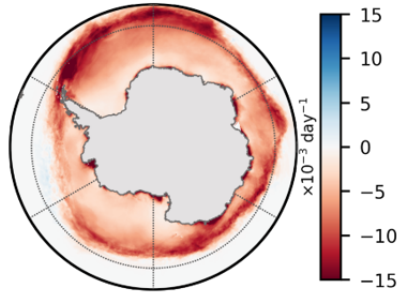

(c) Dec

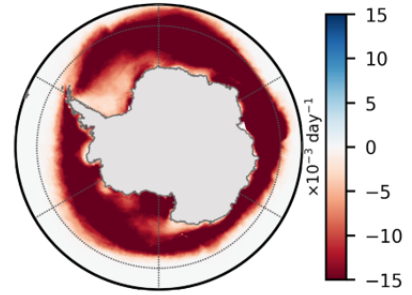

(d) Jan

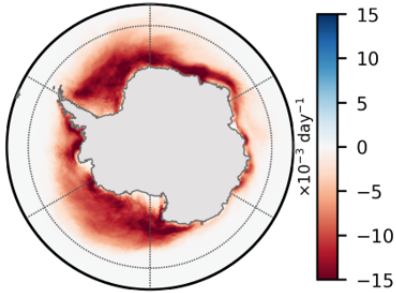

(e) Feb

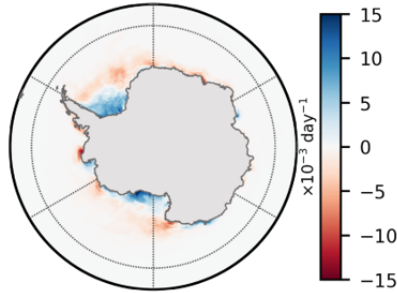

(f) Mar

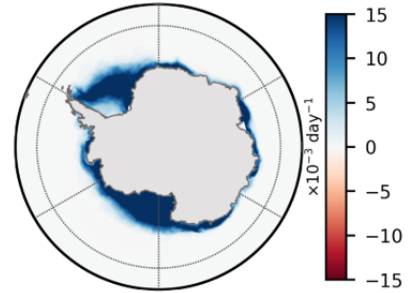

**Figure S8:** Monthly climatology of the late spring and summer tendency term of the model's SIC budget.

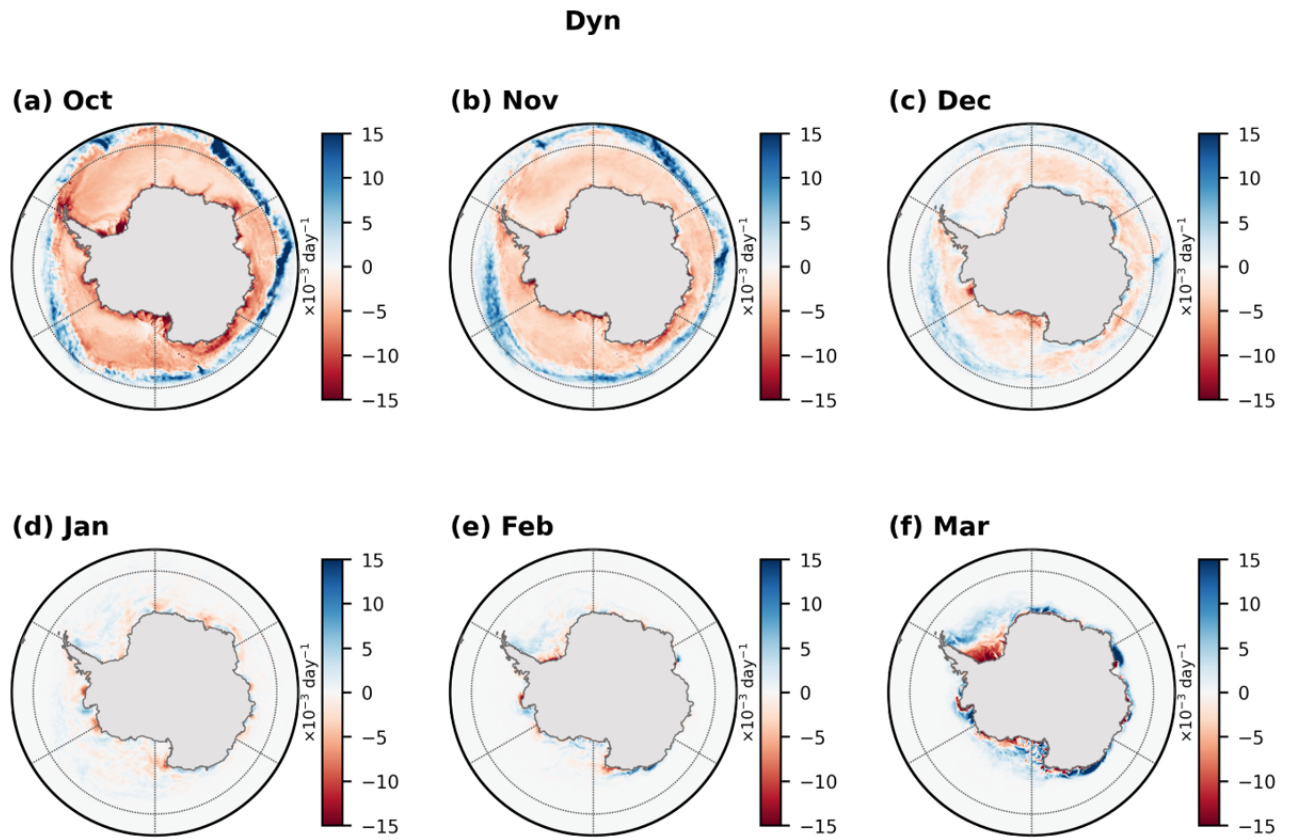

**Figure S9:** Monthly climatology of the late spring and summer dynamic term of the model's SIC budget.



### Thermo

(a) Oct

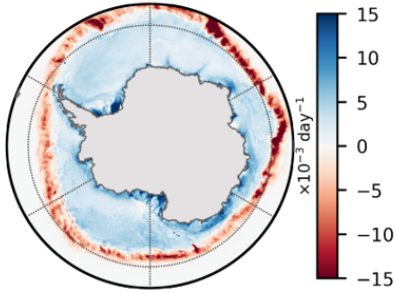

(b) Nov

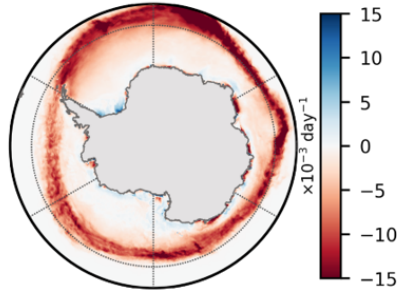

(c) Dec

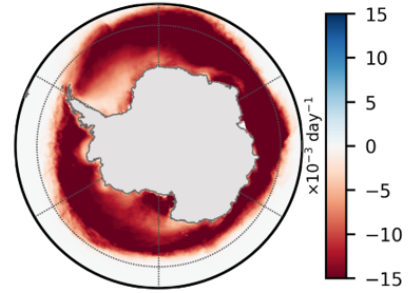

(d) Jan

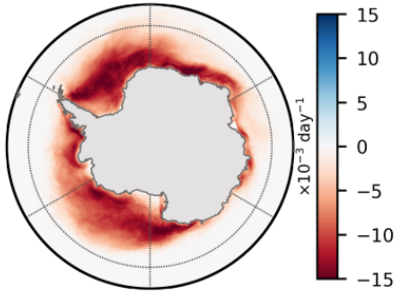

(e) Feb

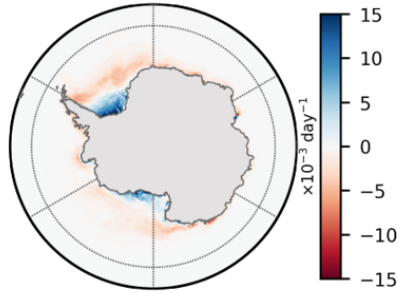

(f) Mar

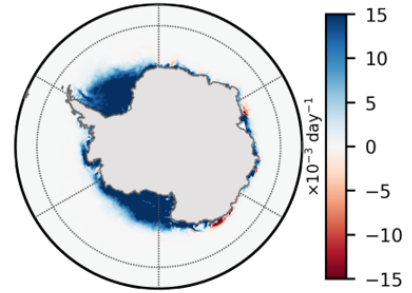

45 **Figure S10:** Monthly climatology of the late spring and summer thermodynamic term of the model's SIC budget.
